# Supplementary material for: Effect of Yogic Sukshma Vyayama on Cardiopulmonary Functions in Young Adults: A Quasi-Experimental Study
Source: Research Square preprint supplement (doi:10.21203/rs.3.rs-7601039/v1), 2025-09-23
Supplement: Supplementary file 1 [file f5e76ab5ff157432164dc83c.docx]

**Supplemental Table 5 ANOVA results regarding within-group, between-group, and interaction effects on cardiopulmonary outcomes**

| **Outcomes** | **Sources of variation** | **MS** | ***F* (1, 74)** | ***p*** | ***ηp2*** |
| --- | --- | --- | --- | --- | --- |
| **FVC** | G | 0.013 | 0.023 | 0.879 | <0.001 |
| T | 0.154 | 3.107 | 0.082 | 0.04 |
| G*T | 0.658 | 13.233 | 0.001 | 0.152 |
| **FEV1** | G | 0.202 | 0.486 | 0.488 | 0.007 |
| T | 0.087 | 2.995 | 0.088 | 0.039 |
| G*T | 0.221 | 7.6 | 0.007 | 0.093 |
| **FEV1/FVC** | G | 111.33 | 0.97 | 0.33 | 0.01 |
| T | 6.32 | 0.5 | 0.48 | 0.01 |
| G*T | 65.9 | 5.22 | 0.03 | 0.07 |
| **FEF 25-75** | G | 1.183 | 0.86 | 0.357 | 0.011 |
| T | 0.539 | 11.056 | 0.001 | 0.13 |
| G*T | 0.019 | 0.381 | 0.539 | 0.005 |
| **PEFR** | G | 3.067 | 1.247 | 0.268 | 0.017 |
| T | 3.512 | 12.779 | 0.001 | 0.147 |
| G*T | 1.427 | 5.192 | 0.026 | 0.066 |
| **MVV** | G | 314.236 | 0.472 | 0.494 | 0.006 |
| T | 145.212 | 3.116 | 0.082 | 0.04 |
| G*T | 362.728 | 7.784 | 0.007 | 0.095 |
| **LA** | G | 16.546 | 1.923 | 0.17 | 0.025 |
| T | 0.028 | 0.063 | 0.802 | 0.001 |
| G*T | 8.028 | 17.781 | <0.001 | 0.194 |
| **CE** | G | 18.1 | 8.891 | 0.004 | 0.107 |
| T | 25.129 | 128.132 | <0.001 | 0.634 |
| G*T | 10.983 | 56.003 | <0.001 | 0.431 |
| **SBP** | G | 17.479 | 0.17 | 0.681 | 0.002 |
| T | 13.677 | 0.85 | 0.36 | 0.011 |
| G*T | 182.914 | 11.368 | 0.001 | 0.133 |
| **DBP** | G | 12.975 | 0.163 | 0.688 | 0.002 |
| T | 17.106 | 0.874 | 0.353 | 0.012 |
| G*T | 340.738 | 17.409 | <0.001 | 0.19 |
| **HR** | G | 772.88 | 6.862 | 0.011 | 0.085 |
| T | 144.308 | 3.984 | 0.05 | 0.051 |
| G*T | 32.3.8 | 0.89 | 0.348 | 0.012 |
| **PP** | G | 60.574 | 0.60 | 0.442 | 0.008 |
| T | 0.192 | 0.007 | 0.934 | <0.001 |
| G*T | 24.349 | 0.88 | 0.352 | 0.012 |
| **MAP** | G | 1.016 | 0.016 | 0.901 | <0.001 |
| T | 15.92 | 1.3 | 0.258 | 0.017 |
| G*T | 282.719 | 23.08 | <0.001 | 0.238 |
| **RPP** | G | 917.627 | 3.60 | 0.062 | 0.046 |
| T | 322.445 | 4.88 | 0.03 | 0.062 |
| G*T | 319.104 | 4.83 | 0.031 | 0.061 |
| **DP** | G | 6578275.39 | 4.05 | 0.048 | 4.05 |
| T | 2126205.09 | 5.31 | 0.024 | 0.067 |
| G*T | 3339956.95 | 8.34 | 0.005 | 0.101 |
